# Supplementary material for: Dynamic changes in host–virus interactions associated with colony founding and social environment in fire ant queens (Solenopsis invicta)
Source: PubMed Central journal article supplement (PMC4716520; doi:10.1002/ece3.1843), 2015-12-29
Supplement: ECE3-6-233-s001.pdf [file ECE3-6-233-s001.pdf]

**Genes associated with SINV-1 and SINV-2 infections**

|               | <i>Drosophila ortholog</i>                         | <i>Gene symbol</i> | <i>Biological function</i>                           | <i>Ref</i>                                               | <i>S. invicta gene</i> | <i>Estimate</i> |
|---------------|----------------------------------------------------|--------------------|------------------------------------------------------|----------------------------------------------------------|------------------------|-----------------|
| IMMUNITY      | <i>ATP synthase, subunit B</i>                     | <i>ATPsyn-b</i>    | phagocytosis                                         | (Stroschein-Stevenson et al., 2006)                      | SINVlc3_039069         | -0.5806         |
|               | <i>α-Mannosidase class II b</i>                    | <i>α-Man-lib</i>   | encapsulation response                               | (Mortimer et al., 2012)                                  | SINVlc3_015687         | -1.3932         |
| METHYLATION   | <i>capsuleen</i>                                   | <i>csul</i>        | methyltransferase activity                           | (Gonsalvez et al., 2006)                                 | SINVlc3_015973         | -0.9694         |
|               | <i>absent, small, or homeotic discs 2</i>          | <i>ash2</i>        | histone H3-K4 methylation                            | (Mohan et al., 2011)                                     | SI2.2.0_13294          | -0.6947         |
| AUTOPHAGY     | <i>pancreatic eIF-2alpha kinase</i>                | <i>PEK</i>         | positive regulation of autophagy                     | (Nagy et al., 2013)                                      | SI2.2.0_04925          | 1.2945          |
|               | <i>Transport and Golgi organization 7</i>          | <i>Tango7</i>      | regulation of apoptotic signalling pathway           | (D'Brot et al., 2013)                                    | SINVlc3_025162         | -0.9321         |
| TRANSCRIPTION | <i>Dorsocross1</i>                                 | <i>Doc1</i>        | regulation of gene expression                        | (Stöbe et al., 2009)                                     | SINVlc3_010276         | -1.1348         |
|               | <i>Protein Dr1; Negative Cofactor 2β</i>           | <i>NC2β</i>        | transcription factor                                 | (Willy et al., 2000)                                     | SINVlc3_030042         | -1.003          |
| FAT BODIES    | <i>CDP diglyceride synthetase</i>                  | <i>CdsA</i>        | lipid storage                                        | (Liu et al., 2014)                                       | SINVlc3_026357         | 1.526           |
|               | <i>Hormone receptor-like in 96</i>                 | <i>Hr96</i>        | triacylglycerol and cholesterol metabolism           | (Sieber and Thummel, 2012)                               | SINVlc3_024099         | -0.7612         |
|               | <i>Cullin 1</i>                                    | <i>Cul1</i>        | InR/PI3K/TOR pathways                                | (Wong et al., 2013)                                      | SI2.2.0_13032          | -0.5181         |
|               | <i>bubblegum</i>                                   | <i>bgm</i>         | long-chain fatty acid metabolic process              | (Min and Benzer, 1999)                                   | SINVlc3_031713         | -0.6886         |
|               | <i>Longevity assurance gene 1</i>                  | <i>schlank</i>     | body fat metabolism                                  | (Bauer et al., 2009)                                     | SI2.2.0_13166          | -0.982          |
| REPRODUCTION  | <i>casein kinase IIa</i>                           | <i>CkIIa</i>       | response to starvation; circadian rhythms; oogenesis | (Ding et al., 2014, Lin et al., 2005, Wong et al., 2011) | SINVlc3_042716         | -0.9853         |
|               | <i>nanos</i>                                       | <i>nos</i>         | oogenesis                                            | (Becalska et al., 2011)                                  | SINVlc3_017341         | -0.9608         |
|               | <i>retain</i>                                      | <i>retn</i>        | oogenesis; regulation of female receptivity          | (Schupbach and Wieschaus, 1991, Ditch et al., 2005)      | SINVlc3_016720         | -0.6532         |
|               | <i>frizzled 2</i>                                  | <i>fz2</i>         | ovarian development                                  | (Cohen et al., 2002)                                     | SINVlc3_024002         | -0.7077         |
| NEURO-SENSORY | <i>concertina</i>                                  | <i>cta</i>         | D5 dopamine receptor binding                         | N/A                                                      | SINVlc3_032097         | -0.8345         |
|               | <i>no on or off transient A</i>                    | <i>nonA</i>        | visual perception                                    | (Rendahl et al., 1992)                                   | SI2.2.0_09391          | -1.7529         |
|               | <i>Rho GTPase activating protein p190</i>          | <i>RhoGAPp190</i>  | mushroom body development                            | (Billuart et al., 2001)                                  | SINVlc3_029401         | -0.5636         |
|               | <i>Dmel_CG11180</i>                                | <i>CG11180</i>     | neurogenesis                                         | (Neumüller et al., 2011)                                 | SI2.2.0_08138          | -0.6541         |
|               | <i>Formin-like protein CG32138</i>                 | <i>CG6807</i>      | neuron projection morphogenesis                      | (Sepp et al., 2008)                                      | SINVlc3_032090         | -0.6422         |
| OTHERS        | <i>Death resistor Adh domain containing target</i> | <i>Drat</i>        | cellular response to ethanol; response to hypoxia    | (Chen et al., 2012)                                      | SINVlc3_012825         | -0.4861         |
|               | <i>Dmel_CG5237</i>                                 | <i>unc79</i>       | locomotory rhythm                                    | (Lear et al., 2013)                                      | SINVlc3_007105         | -0.4946         |
|               | <i>PICK1 ortholog</i>                              | <i>PICK1</i>       | neuroendocrine system; regulated secretory pathway   | (Jansen et al., 2009)                                    | SINVlc3_038018         | -0.7021         |
|               | <i>Poly(A) RNA polymerase gld-2 homolog A</i>      | <i>Gld2</i>        | long-term memory                                     | (Kwak et al., 2008)                                      | SINVlc3_018308         | -0.7352         |

**Note:** positive “Estimate” means up-regulated in SINV-1 infected, while negative “Estimate” means up-regulated in SINV-2 infected.

## References

- BAUER, R., VOELZMANN, A., BREIDEN, B., SCHEPERS, U., FARWANAH, H., HAHN, I., ECKARDT, F., SANDHOFF, K. & HOCH, M. 2009. Schlank, a member of the ceramide synthase family controls growth and body fat in *Drosophila*. *The EMBO Journal*, 28, 3706-3716.
- BECALSKA, A. N., KIM, Y. R., BELLETIER, N. G., LERIT, D. A., SINSIMER, K. S. & GAVIS, E. R. 2011. Aubergine is a component of a nanos mRNA localization complex. *Developmental biology*, 349, 46-52.
- BILLUART, P., WINTER, C. G., MARESH, A., ZHAO, X. & LUO, L. 2001. Regulating axon branch stability. The role of p190 RhoGAP in repressing a retraction signaling pathway. *Cell*, 107, 195-207.
- CHEN, P., TU, X., AKDEMIR, F., CHEW, S. K., ROTHENFLUH, A. & ABRAMS, J. M. 2012. Effectors of alcohol-induced cell killing in *Drosophila*. *Cell Death and Differentiation*, 19, 1655-1663.
- COHEN, E. D., MARIOL, M. C., WALLACE, R. M. H., WEYERS, J., KAMBEROV, Y. G., PRADEL, J. & WILDER, E. L. 2002. DWnt4 regulates cell movement and focal adhesion kinase during *Drosophila* ovarian morphogenesis. *Developmental Cell*, 2, 437-448.
- D'BROT, A., CHEN, P., VAISHNAV, M., YUAN, S., AKEY, C. W. & ABRAMS, J. M. 2013. Tango7 directs cellular remodeling by the *Drosophila* apoptosome. *Genes & Development*, 27, 1650-1655.
- DING, F., GIL, M. P., FRANKLIN, M., FERREIRA, J., TATAR, M., HELFAND, S. L. & NERETTI, N. 2014. Transcriptional response to dietary restriction in *Drosophila melanogaster*. *Journal of Insect Physiology*, 69, 101-106.
- DITCH, L. M., SHIRANGI, T., PITMAN, J. L., LATHAM, K. L., FINLEY, K. D., EDEEN, P. T., TAYLOR, B. J. & MCKEOWN, M. 2005. *Drosophila* retained/dead ringer is necessary for neuronal pathfinding, female receptivity and repression of fruitless independent male courtship behaviors. *Development*, 132, 155-164.
- GONSALVEZ, G. B., RAJENDRA, T. K., TIAN, L. & MATERA, A. G. 2006. The Sm-protein methyltransferase, dart5, is essential for germ-cell specification and maintenance. *Current Biology*, 16, 1077-1089.
- JANSEN, A. M., NÄSSEL, D. R., MADSEN, K. L., JUNG, A. G., GETHER, U. & KJAERULFF, O. 2009. PICK1 expression in the *Drosophila* central nervous system primarily occurs in the neuroendocrine system. *Journal of Comparative Neurology*, 517, 313-332.
- KWAK, J. E., DRIER, E., BARBEE, S. A., RAMASWAMI, M., YIN, J. C. & WICKENS, M. 2008. GLD2 poly (A) polymerase is required for long-term memory. *Proceedings of the National Academy of Sciences*, 105, 14644-14649.
- LEAR, B. C., DARRAH, E. J., ALDRICH, B. T., GEBRE, S., SCOTT, R. L., NASH, H. A. & ALLADA, R. 2013. UNC79 and UNC80, putative auxiliary subunits of the narrow abdomen ion channel, are indispensable for robust circadian locomotor rhythms in *Drosophila*. *PLoS ONE*, 8, e78147.
- LIN, J. M., SCHROEDER, A. & ALLADA, R. 2005. In vivo circadian function of casein kinase 2 phosphorylation sites in *Drosophila* PERIOD. *Journal of Neuroscience*, 25, 11175-11183.
- LIU, Y., WANG, W., SHUI, G. & HUANG, X. 2014. CDP-Diacylglycerol Synthetase Coordinates Cell Growth and Fat Storage through Phosphatidylinositol Metabolism and the Insulin Pathway. *PLoS Genetics*, 10, e1004172.

## Genes associated with SINV-1 and SINV-2 infections

- MIN, K. T. & BENZER, S. 1999. Preventing neurodegeneration in the *Drosophila* mutant bubblegum. *Science*, 284, 1985-1988.
- MOHAN, M., HERZ, H. M., SMITH, E. R., ZHANG, Y., JACKSON, J., WASHBURN, M. P., FLORENS, L., EISSENBERG, J. C. & SHILATIFARD, A. 2011. The COMPASS Family of H3K4 Methylases in *Drosophila*. *Molecular and Cellular Biology*, 31, 4310-4318.
- MORTIMER, N. T., KACSOH, B. Z., KEEBAUGH, E. S. & SCHLENKE, T. A. 2012. Mgat1-dependent N-glycosylation of Membrane Components Primes *Drosophila melanogaster* Blood Cells for the Cellular Encapsulation Response. *PLoS Pathogens*, 8, e1002819.
- NAGY, P., VARGA, A., PIRCS, K., HEGEDŰS, K. & JUHÁSZ, G. 2013. Myc-Driven Overgrowth Requires Unfolded Protein Response-Mediated Induction of Autophagy and Antioxidant Responses in *Drosophila melanogaster*. *PLoS Genetics*, 9, e1003664.
- NEUMÜLLER, R. A., RICHTER, C., FISCHER, A., NOVATCHKOVA, M., NEUMÜLLER, K. G. & KNOBLICH, J. A. 2011. Genome-Wide Analysis of Self-Renewal in *Drosophila* Neural Stem Cells by Transgenic RNAi. *Cell stem cell*, 8, 580-593.
- RENDAHL, K., JONES, K., KULKARNI, S., BAGULLY, S. & HALL, J. 1992. The dissonance mutation at the no-on-transient-A locus of *D. melanogaster*: genetic control of courtship song and visual behaviors by a protein with putative RNA-binding motifs. *The Journal of neuroscience*, 12, 390-407.
- SCHUPBACH, T. & WIESCHAUS, E. 1991. Female sterile mutations on the second chromosome of *Drosophila melanogaster*. *Genetics*, 129, 1119-1136.
- SEPP, K. J., HONG, P., LIZARRAGA, S. B., LIU, J. S., MEJIA, L. A., WALSH, C. A. & PERRIMON, N. 2008. Identification of neural outgrowth genes using genome-wide RNAi. *PLoS Genetics*, 4, e1000111.
- SIEBER, M. H. & THUMMEL, C. S. 2012. Coordination of Triacylglycerol and Cholesterol Homeostasis by DHR96 and the *Drosophila* LipA Homolog magro. *Cell Metabolism*, 15, 122-127.
- STÖBE, P., STEIN, M. A., STEIN, S. M., HABRING-MÜLLER, A., BEZDAN, D., FUCHS, A. L., HUEBER, S. D., WU, H. & LOHMANN, I. 2009. Multifactorial regulation of a hox target gene. *PLoS Genetics*, 5, e1000412.
- STROSCHEIN-STEVENSON, S. L., FOLEY, E., O'FARRELL, P. H. & JOHNSON, A. D. 2006. Identification of *Drosophila* gene products required for phagocytosis of *Candida albicans*. *PLoS Biology*, 4, e4.
- WILLY, P. J., KOBAYASHI, R. & KADONAGA, J. T. 2000. A basal transcription factor that activates or represses transcription. *Science*, 290, 982-985.
- WONG, J. J., LI, S., LIM, E. K., WANG, Y., WANG, C., ZHANG, H., KIRILLY, D., WU, C., LIOU, Y. C., WANG, H. & YU, F. 2013. A Cullin1-Based SCF E3 Ubiquitin Ligase Targets the InR/PI3K/TOR Pathway to Regulate Neuronal Pruning. *PLoS Biology*, 11, e1001657.
- WONG, L. C., COSTA, A., MCLEOD, I., SARKESHIK, A., YATES, J., KYIN, S., PERLMAN, D. & SCHEDL, P. 2011. The Functioning of the *Drosophila* CPEB Protein Orb Is Regulated by Phosphorylation and Requires Casein Kinase 2 Activity. *PLoS ONE*, 6, e24355.
