# Supplementary material for: Dynamic changes in host–virus interactions associated with colony founding and social environment in fire ant queens (Solenopsis invicta)
Source: PubMed Central journal article supplement (PMC4716520; doi:10.1002/ece3.1843), 2015-12-29
Supplement: ECE3-6-233-s003.pdf [file ECE3-6-233-s003.pdf]

**Dynamic changes in host-virus interactions associated with colony founding and social environment in fire ant queens (*Solenopsis invicta*)**

Fabio Manfredini, DeWayne Shoemaker, Christina M. Grozinger; *Ecology and Evolution*

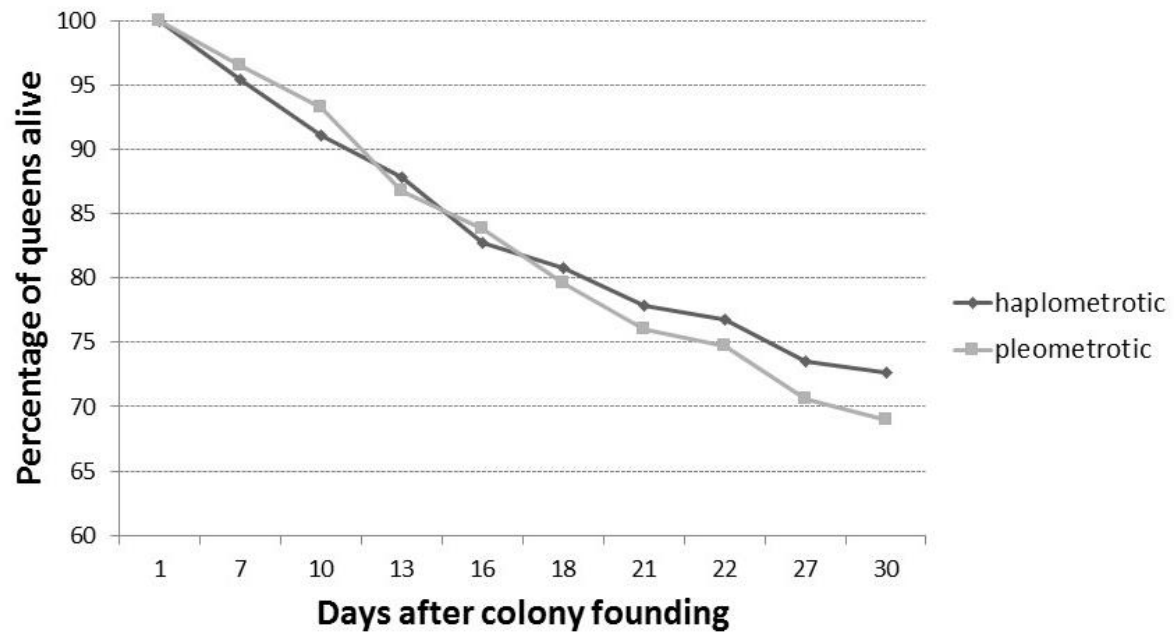

**Figure S1.** Survival curves for founding queens during the first month of activity. The chart shows separate analyses for single and paired queens (haplometrotic and pleometrotic, respectively).
